# Supplementary material for: Deletion of the chloroplast LTD protein impedes LHCI import and PSI–LHCI assembly in Chlamydomonas reinhardtii
Source: PubMed Central journal article supplement (PMC6018721; doi:10.1093/jxb/erx457), 2017-12-30

# SUPPLEMENTARY MATERIAL

## Deletion of the chloroplast LTD protein impedes LHCI import and PSI-LHCI assembly in *Chlamydomonas reinhardtii*

Jooyeon Jeong<sup>1,6</sup>, Kwangryul Baek<sup>1,6</sup>, Jihyeon Yu<sup>2,6</sup>, Henning Kirst<sup>3</sup>, Nico Betterle<sup>3</sup>, Woongghi Shin<sup>4</sup>, Sangsu Bae<sup>5\*</sup>, Anastasios Melis<sup>3\*</sup> and EonSeon Jin<sup>1\*</sup>

<sup>1</sup> Department of Life Science and Research Institute for Natural Sciences, Hanyang University, Seoul, 04763, Korea

<sup>2</sup> School of Biological Sciences, Seoul National University, Seoul, 08826, Korea

<sup>3</sup> Department of Plant and Microbial Biology, University of California, Berkeley, California 94720-3102, USA

<sup>4</sup> Department of Biology, Chungnam National University, Daejeon, 34134, Korea

<sup>5</sup> Department of Chemistry, Hanyang University, Seoul, 04763, Korea

<sup>6</sup>These authors contributed equally to this article.

\*Corresponding authors:

EonSeon Jin: Tel: +82-2-2220-2561; e-mail: [esjin@hanyang.ac.kr](mailto:esjin@hanyang.ac.kr)

Anastasios Melis: Tel: +1-510-642-8166; e-mail: [melis@berkeley.edu](mailto:melis@berkeley.edu)

Sangsu Bae: Tel: +82-2-2220-2618; e-mail: [sangsubae@hanyang.ac.kr](mailto:sangsubae@hanyang.ac.kr)

**Supplementary Table 1S.** Target sequences of four sgRNAs used to recognize the *Crltd* gene.

|        | RGEN Target (5' to 3')  | Position | Cleavage        |           | GC Contents<br>(%, w/o PAM) | Out-of-<br>frame<br>Score | Mismatches |   |   |   |    |
|--------|-------------------------|----------|-----------------|-----------|-----------------------------|---------------------------|------------|---|---|---|----|
|        |                         |          | Position<br>(%) | Direction |                             |                           | 0          | 1 | 2 | 3 | 4  |
| sgRNA1 | AAGGGCGATGCGCTGCATTATGG | 55       | 10.7            | -         | 55                          | <u>65.5</u>               | <u>1</u>   | 0 | 0 | 0 | 10 |
| sgRNA2 | ATGGCGCACAGTGCAGCCACGG  | 97       | 18.1            | -         | 65                          | <u>68.9</u>               | <u>1</u>   | 0 | 0 | 0 | 14 |
| sgRNA3 | TCATCTTCTCGCCATATCTCGGG | 132      | 26.3            | +         | 45                          | <u>60.3</u>               | <u>1</u>   | 0 | 0 | 0 | 1  |
| sgRNA4 | AAGTTGGCAGTCACATTGCGGGG | 118      | 47.86           | -         | 50                          | 59.4                      | 1          | 0 | 0 | 0 | 2  |

**Supplementary Table 2S.** The mutation frequency and pattern analysis of wild type and RNP-transfected cells. (A) The frequency of mutations (insertions and deletions; indels) in the wild-type (control) and RNP-transfected cells (experiment) measured for each sgRNA by targeted deep sequencing. (B) Mutation pattern analysis of RNP-transfected cells for sgRNA1. The top three indel patterns are listed. Patterns 1 and 3 were identical to those of *Crltd1* and *Crltd4*, respectively.

**A.**

|        | Target sequence         | Sample     | Total counts | Mutation counts | Mutation ratio (%) |
|--------|-------------------------|------------|--------------|-----------------|--------------------|
| sgRNA1 | AAGGGCGATGCGCTGCATTATGG | control    | 55401        | 9               | 0.02%              |
|        |                         | experiment | 52027        | 913             | 1.75%              |
| sgRNA2 | ATGGCGCACAGTGCAGCCACGG  | control    | 55401        | 9               | 0.02%              |
|        |                         | experiment | 50897        | 9               | 0.02%              |
| sgRNA3 | TCATCTTCTCGCCATATCTCGGG | control    | 61508        | 2               | 0.00%              |
|        |                         | experiment | 53492        | 9               | 0.02%              |
| sgRNA4 | AAGTTGGCAGTCACATTGCGGGG | control    | 61508        | 2               | 0.00%              |
|        |                         | experiment | 46198        | 6               | 0.01%              |

**B.**

| Top rank  | Target sequence                      | Insertion/Deletion | Mutation counts |
|-----------|--------------------------------------|--------------------|-----------------|
| Wild type | ACTCGACCATAAATGCAGCGCATCGCCCTTGCCTCG | -                  | -               |
| 1         | ACTCGACCATAAATGCAGCGCATCGCCCTTGCCTCG | +1                 | 222 counts      |
| 2         | ACTCGACCATAAATGCAGCGCATCGCCCTTGCCTCG | +1                 | 206 counts      |
| 3         | ACTCGACCATAAATGCAGCGCATCGCCCTTGCCTCG | +1                 | 123 counts      |

**Supplementary Table 3S.** Analysis of off-target effects in the wild type and *Crltd1*. Mutation frequencies at potential off-target sites of the *Crltd* gene-specific sgRNA1 were measured by targeted deep sequencing in the wild type and *Crltd1*. Potential off-target sites that differed from on-target sites by up to 4 nucleotides were selected. Different nucleotides between on-target and off-target are highlighted in Red.

| Target (5' to 3')        | Wild type   |             |                     | <i>Crltd1</i> |             |                     |
|--------------------------|-------------|-------------|---------------------|---------------|-------------|---------------------|
|                          | Total reads | Indel reads | Indel frequency (%) | Total reads   | Indel reads | Indel frequency (%) |
| gAAGcCGATGCGCTaCgTTATGG  | 14321       | 0           | 0.0                 | 8584          | 0           | 0.0                 |
| AAcGGCcAacCGCTGCATTACGG  | 27539       | 0           | 0.0                 | 20148         | 0           | 0.0                 |
| AAGGGCGAgGCGCTGctggAGGG  | 31882       | 2           | 0.006               | 21134         | 0           | 0.0                 |
| cAGGAcCaATGCGCTGCAcTAGGG | 37847       | 0           | 0.0                 | 30822         | 0           | 0.0                 |
| AAGGGCGcTgtGCcGCAaTACGG  | 40377       | 0           | 0.0                 | 27765         | 0           | 0.0                 |
| AAcGGCGcTGCgCTGCATcgTGG  | 29388       | 0           | 0.0                 | 17057         | 0           | 0.0                 |
| AAcGGCGgcGCGCTGCAgTACGG  | 31603       | 0           | 0.0                 | 10426         | 0           | 0.0                 |

**Supplementary Figure 1S.** Visual examination of *C. reinhardtii* colonies in the course of screening for *Crltd* gene knockout mutant. Out of 388 colonies, 10 colonies were selected as the putative *ltd* knockout mutants (indicate with red circles). Among them, we finally identified four *ltd* knockout mutants by Sanger sequencing.

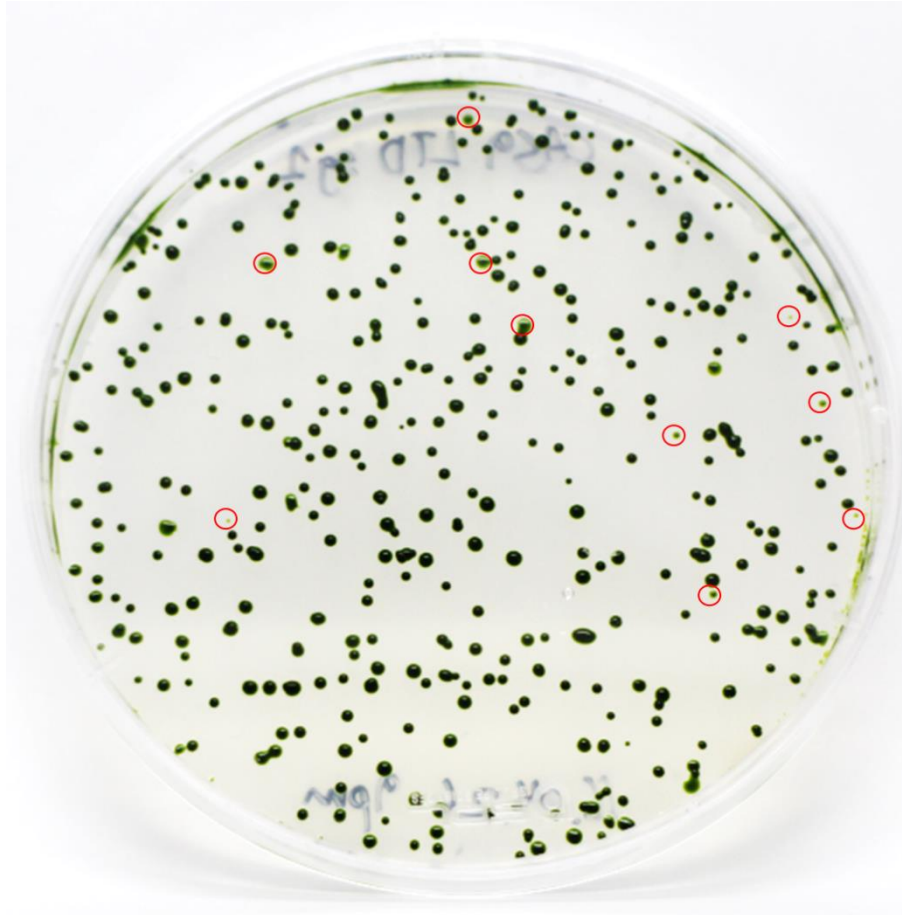

**Supplementary Figure 2S.** Sanger sequencing chromatograms for CRISPR-Cas9-induced *Crltd* mutant strains. *ltd* DNA sequences of four *Crltd* strains were confirmed by Sanger sequencing. The start codon of the wild type is indicated with a red box. Ins, insertions; del, deletions.

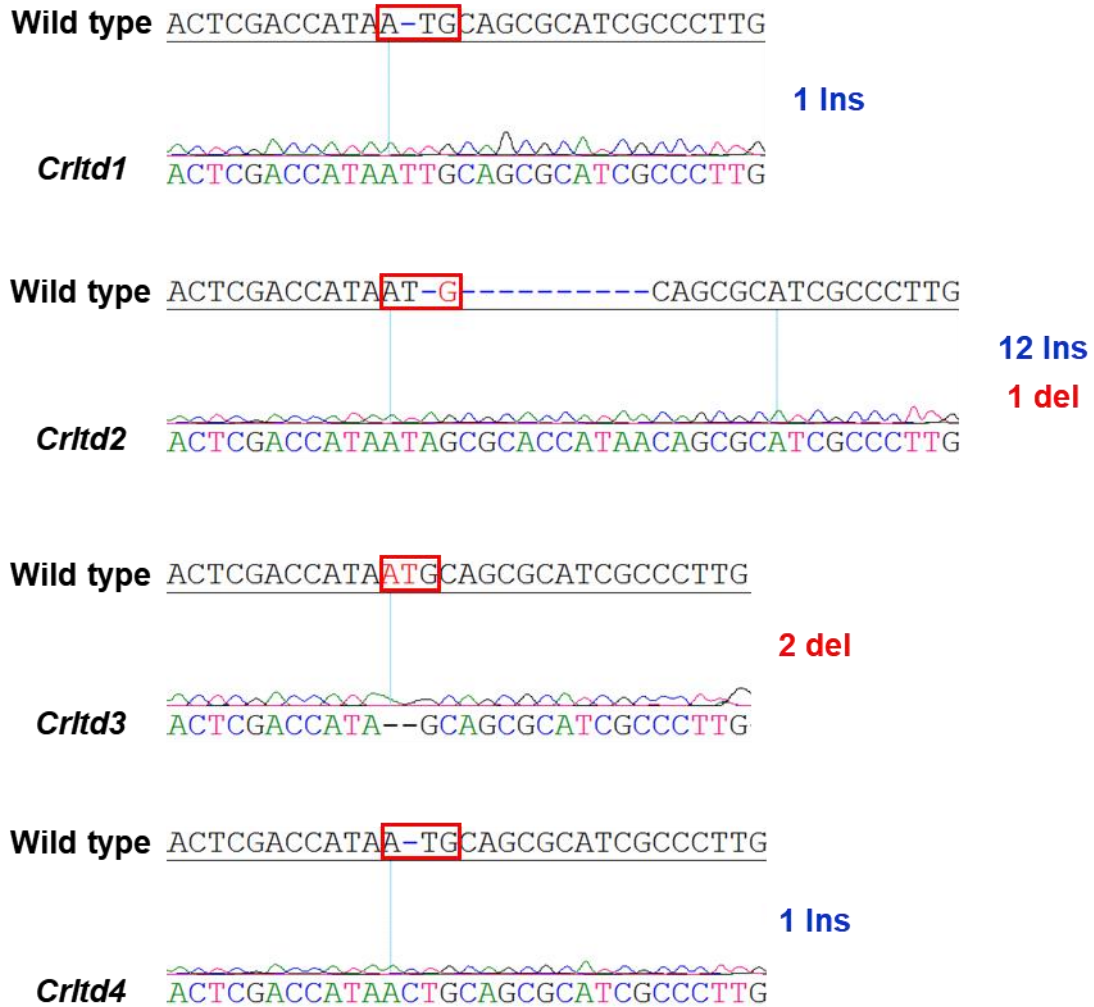

**Supplementary Figure 3S.** Growth curves of wild type (black) and *Crltd1* mutant (red) at different light intensities. Photoautotrophic growth under the light intensity of 100  $\mu\text{mol photons m}^{-2} \text{s}^{-1}$  (A), 350  $\mu\text{mol photons m}^{-2} \text{s}^{-1}$  (B) (n =3; values shown are means  $\pm$  SD).

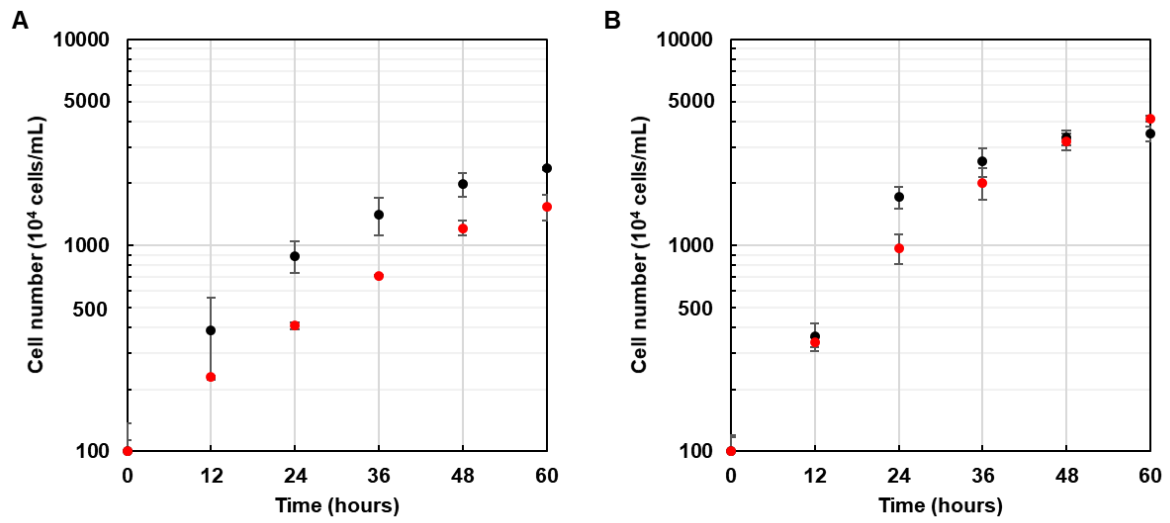





**Supplementary Figure 5S.** Analysis of thylakoid membrane protein complexes in the wild type and *Crld1* mutant. The proteins were separated by Deriphat PAGE (1), Coomassie blue stained (2) and immunodetected with four antibodies, anti-PsaA (3), anti-PsbA (4), anti-LHCB (5) and anti-LHCBM5 (6).

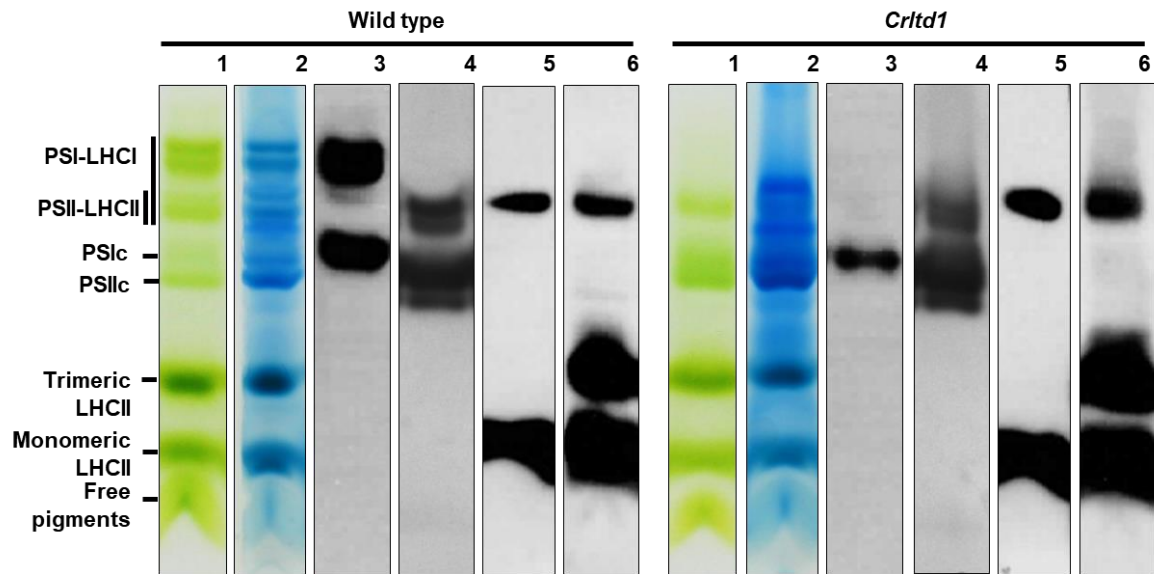

Supplement: erx457_suppl_supplementary_tables_and_figures.pdf [file erx457_suppl_supplementary_tables_and_figures.pdf]
